# Supplementary material for: Ternary low-temperature phototherapy nano-systems for the treatment of diabetic wounds
Source: Royal Society of Chemistry journal article supplement (doi:10.1039/d3tb02224b), 2023-12-13
Supplement: d3tb02224b1.pdf [file d3tb02224b1.pdf]

## Supporting Information

### **Ternary low-temperature phototherapy nano-system for the treatment of diabetic wounds**

Shaopeng Liu, Dan Peng, Shuohan He, Xuan Li, Yi Wu, Xin Liu, Yang Zhang, Peng Liu\*,

Kaiyong Cai\*

Key Laboratory of Biorheological Science and Technology, Ministry of Education,

College of Bioengineering, Chongqing University, Chongqing, 400044, China

\*Corresponding author. liupeng79@cqu.edu.cn, kaiyong\_cai@cqu.edu.cn

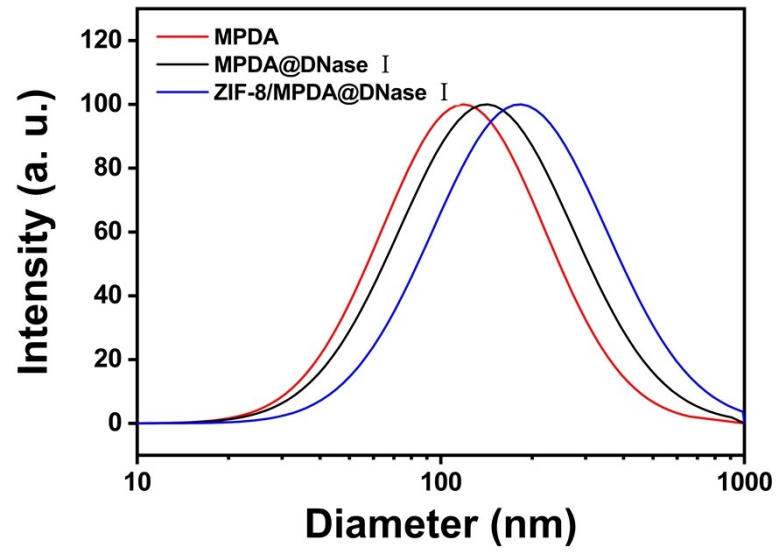

Figure S1 DLS image of different NPs.

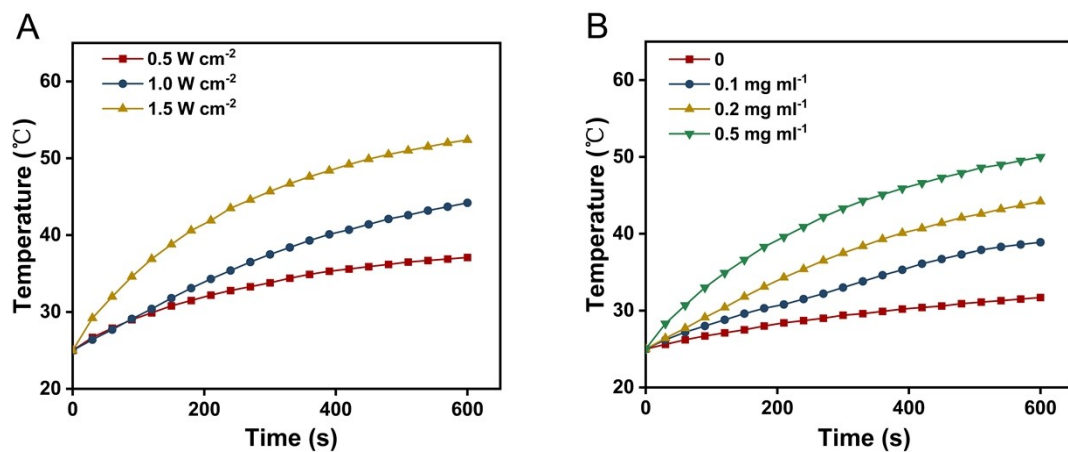

**Figure S2** (A) Temperature changes of ZIF-8/MPDA@DNase I NPs solution at the concentration of 0.2 mg/mL with different power densities of NIR irradiation; (B) Temperature changes of ZIF-8/MPDA@DNase I NPs solution at different concentrations under NIR irradiation (1 W/cm<sup>2</sup>).

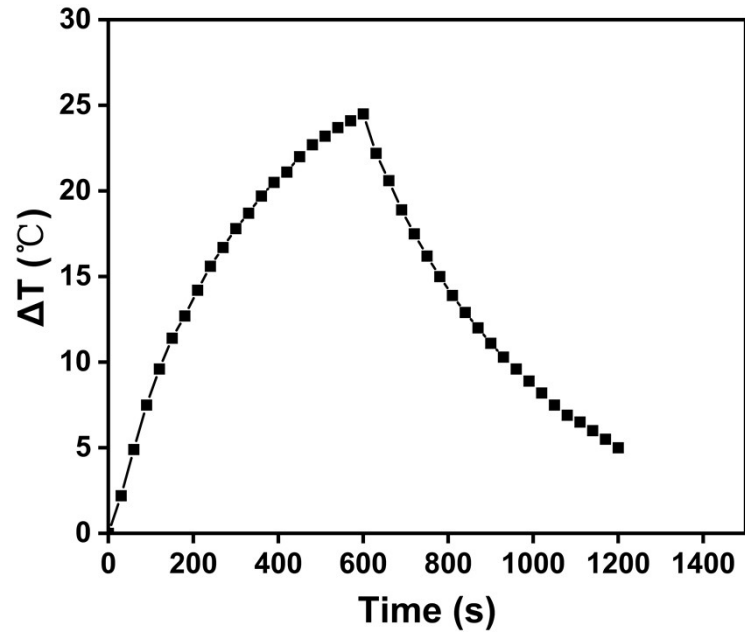

**Figure S3** The temperature variation of ZIF-8/MPDA@DNase I NPs solution (0.5 mg/mL) under NIR irradiation or not.

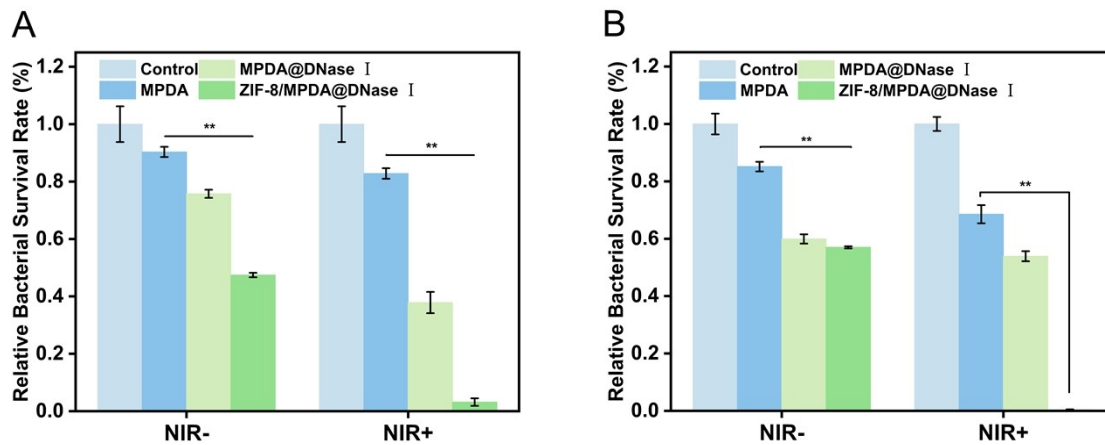

**Figure S4** The corresponding relative bacterial survival rate of (A) *S. aureus* and (B) *E. coli*.

Mean± SD, n=3, \*\* $p < 0.01$ .
